# Supplementary material for: QM/MD simulations on the role of SiO2in polymeric insulation materials
Source: Royal Society of Chemistry journal article supplement (doi:10.1039/c5ra19512h), 2015-12-11
Supplement: c5ra19512h1.pdf [file c5ra19512h1.pdf]

## Supporting Information

for

### QM/MD simulations on the role of SiO<sub>2</sub> in polymeric insulation materials

Baozhong Han,<sup>\*ac</sup> Menggai Jiao,<sup>b</sup> Chengcheng Zhang,<sup>a</sup> Chunyang Li,<sup>a</sup> Zhijian Wu,<sup>b</sup> Ying Wang<sup>\*ab</sup>  
and Hui Zhang<sup>a</sup>

<sup>a</sup> Key Laboratory of Engineering Dielectrics and Its Application (Harbin University of Science and Technology),  
Ministry of Education, Harbin, 150080, PR China

<sup>b</sup> State Key Laboratory of Rare Earth Resource Utilization, Changchun Institute of Applied Chemistry, Chinese  
Academy of Sciences, Changchun 130022, PR China

\* Corresponding authors. E-mail: ywang\_2012@ciac.ac.cn; hbzhlij@163.com

#### Figure Caption:

**Figure S1.** The last snapshots at 60 ps for a-c) Model  $S_{1-3}^0$ ; d-f) Model  $S_{1-3}^{1-}$ ; g-i) Model  $S_{1-3}^{2-}$ ; j-l)  
Model  $S_{1-3}^{3-}$ ; m-o) Model  $S_{1-3}^{4-}$ ; p-r) Model  $L_{1-3}^0$ ; s-u) Model  $L_{1-3}^{1-}$ .

**Figure S2.** The RDF of Mulliken charge distribution around SiO<sub>2</sub> nanoparticles for each trajectory.  
a-e) for Model  $S^n$  (n=0-4); f-g) for Model  $L^n$  (n=0, 1).

**Figure S3.** The Lindman Index (L.I.) a, b) of C and all atoms for PE,  $S^n$ ,  $L^n$  (n=0, 1); c, d) of C and all  
atoms for  $S^n$  (n=0-4).

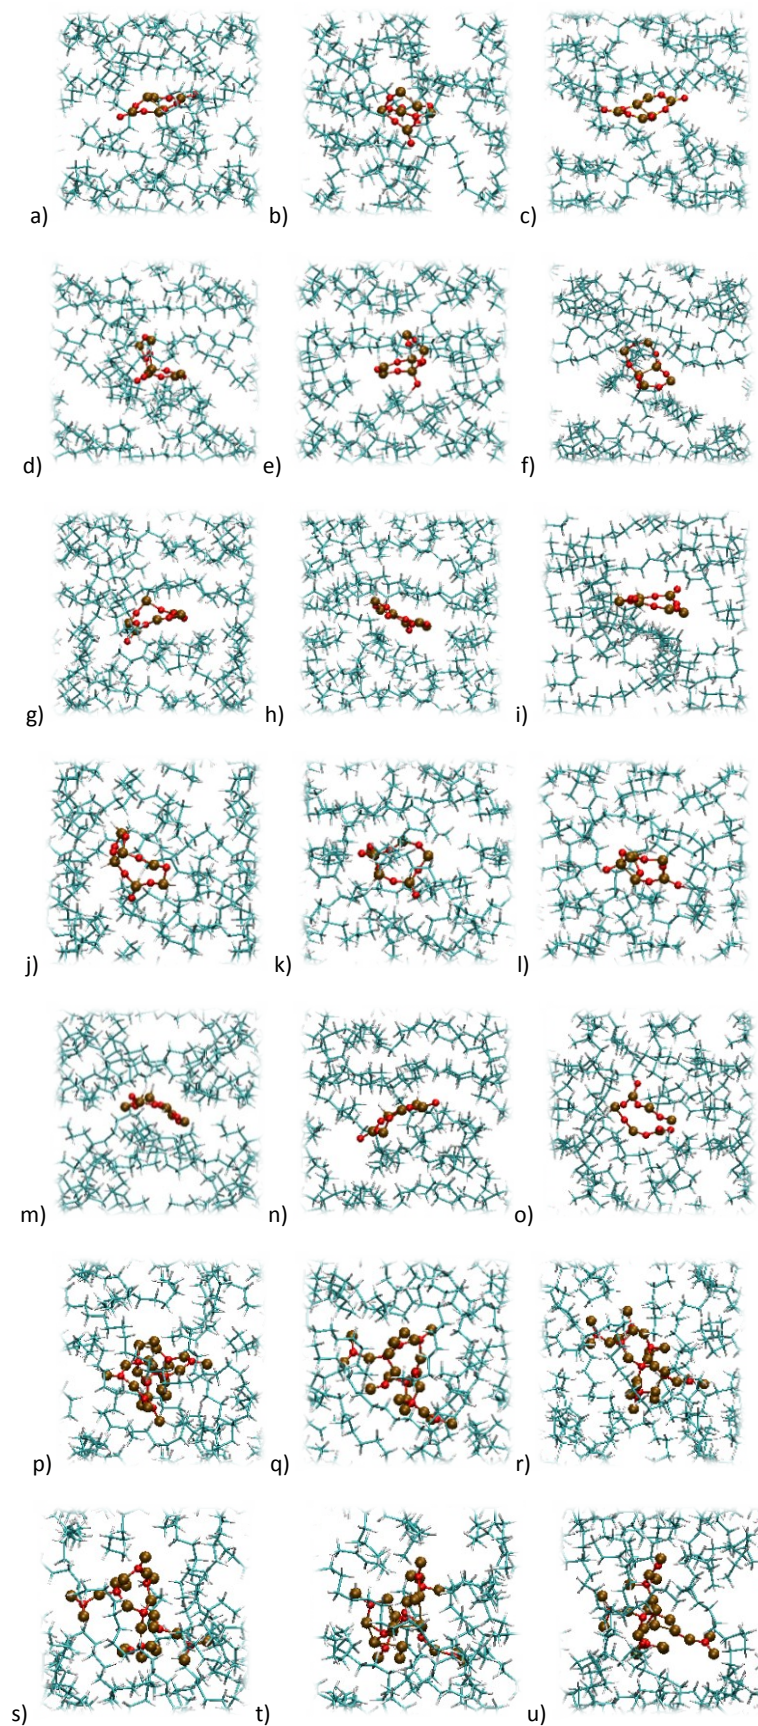

**Figure S1.** The last snapshots at 60 ps for a-c) Model  $S_{1-3}^0$ ; d-f) Model  $S_{1-3}^{1-}$ ; g-i) Model  $S_{1-3}^{2-}$ ; j-l)

Model  $S_{1-3}^{3-}$ ; m-o) Model  $S_{1-3}^{4-}$ ; p-r) Model  $L_{1-3}^0$ ; s-u) Model  $L_{1-3}^{1-}$ .

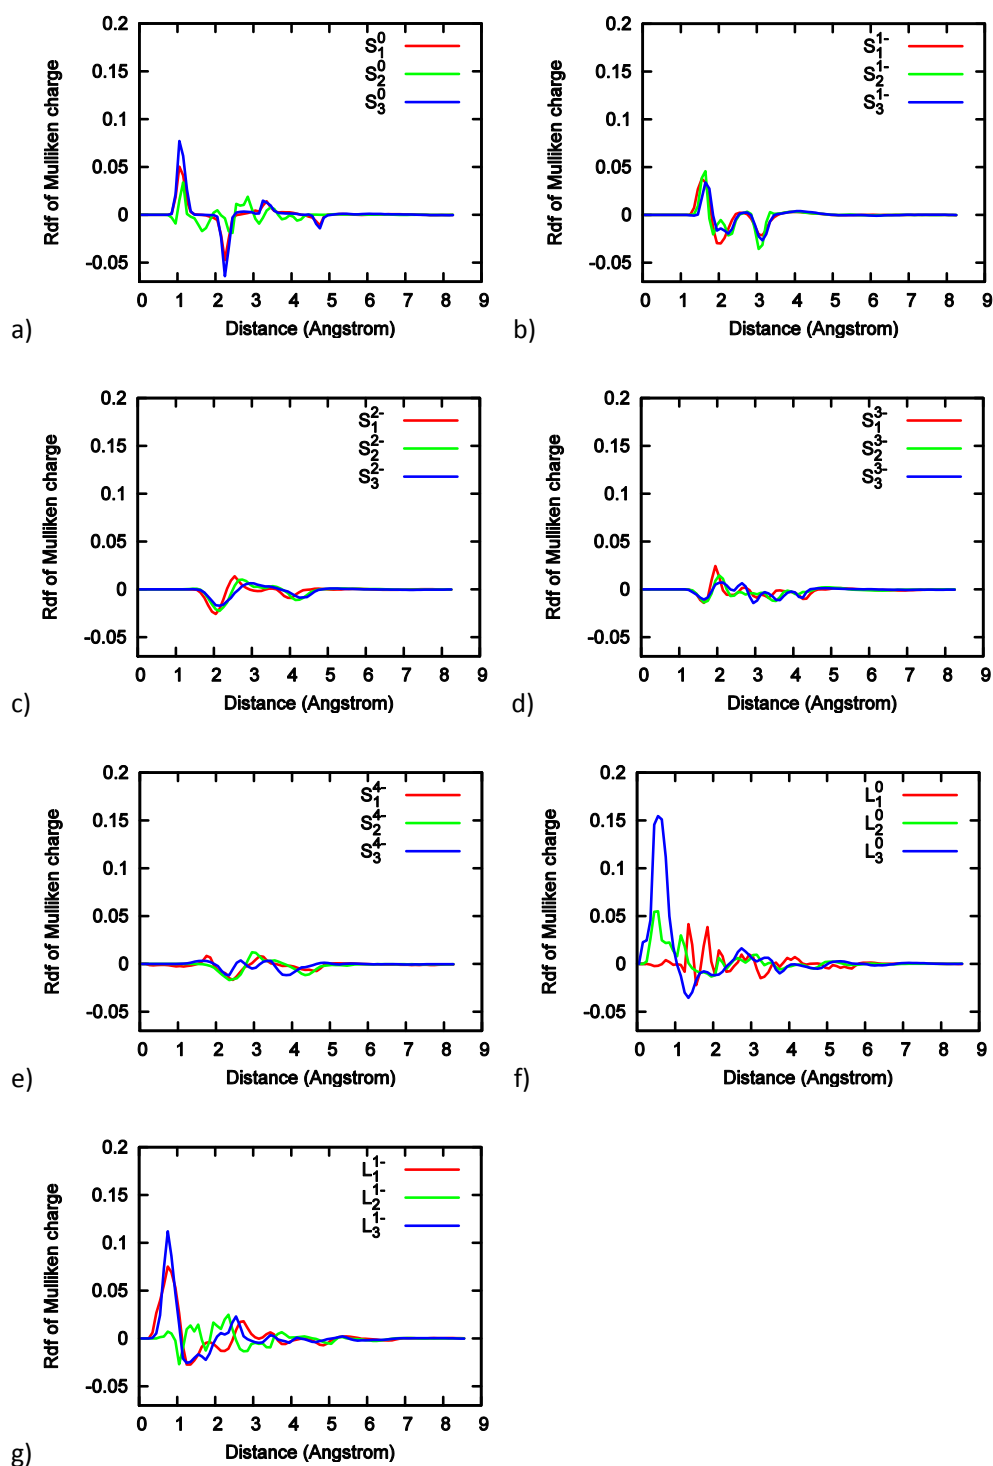

**Figure S2.** The RDF of Mulliken charge distribution around SiO<sub>2</sub> nanoparticles for each trajectory. a-e) for Model  $S^n$  ( $n=0-4$ ); f-g) for Model  $L^n$  ( $n=0, 1$ ).

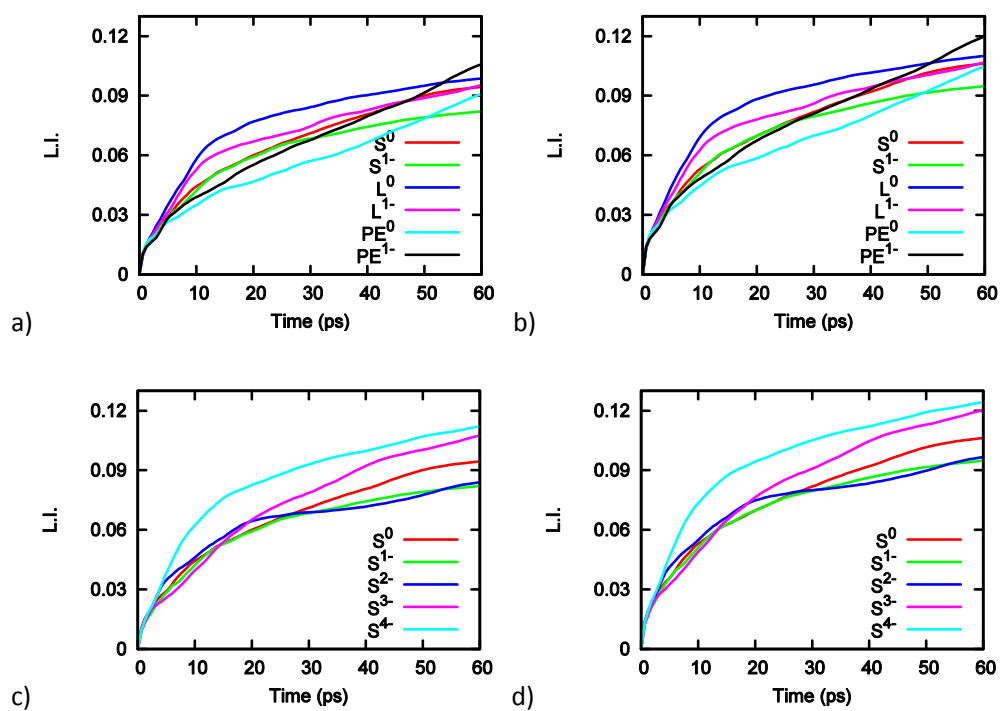

**Figure S3.** The Lindman Index (L.I.) a, b) of C and all atoms for PE,  $S^{n-}$ ,  $L^{n-}$  ( $n=0, 1$ ); c, d) of C and all atoms for  $S^{n-}$  ( $n=0-4$ ).
